# Supplementary material for: Gut Microbiome: The Interplay of an “Invisible Organ” with Herbal Medicine and Its Derived Compounds in Chronic Metabolic Disorders
Source: MDPI journal article supplement (doi:10.3390/ijerph192013076), 2022-10-11
Supplement: s1 [file s1]

**Figure S1.** General information of selected papers in the present review.

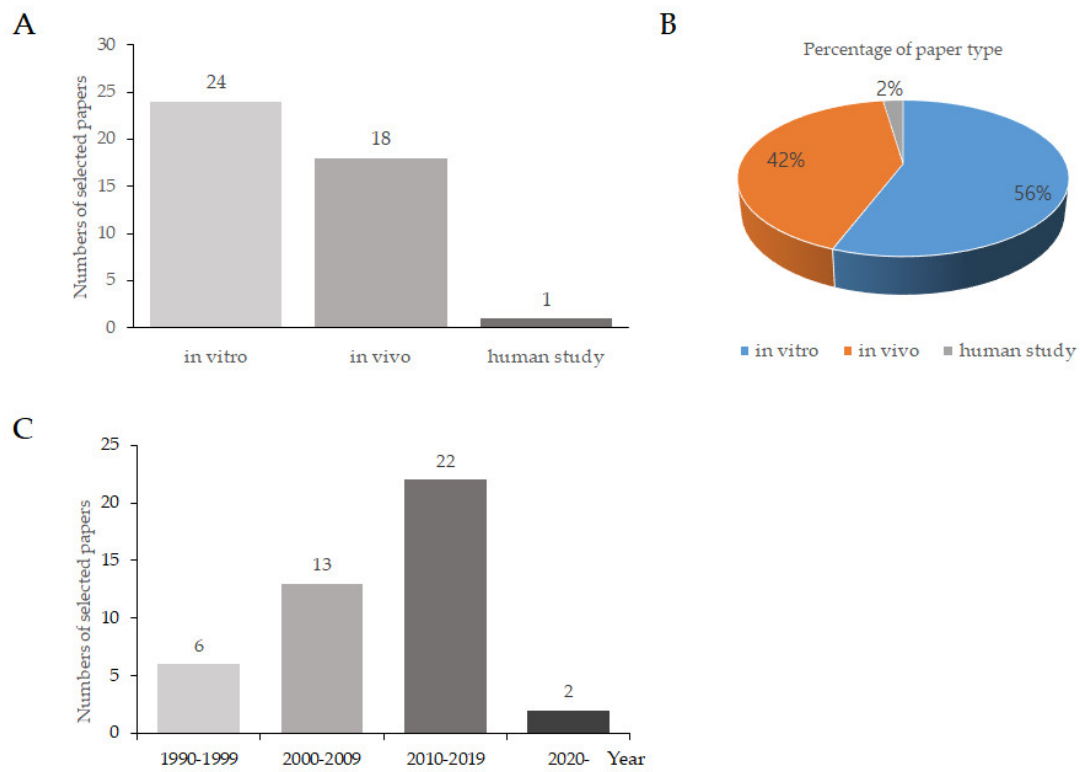

- A) Numbers of selected papers based on the research types
- B) Percentages of selected papers based on the research types
- C) Numbers of selected papers based on the decade
